# Supplementary material
Source: Springer Nature journal article supplement (https://www.springermedizin.de/resource/supplementary/12891_2006_226_MOESM1_ESM.pdf/9510792)

Zones

I

II

III

IVA

IVB

V

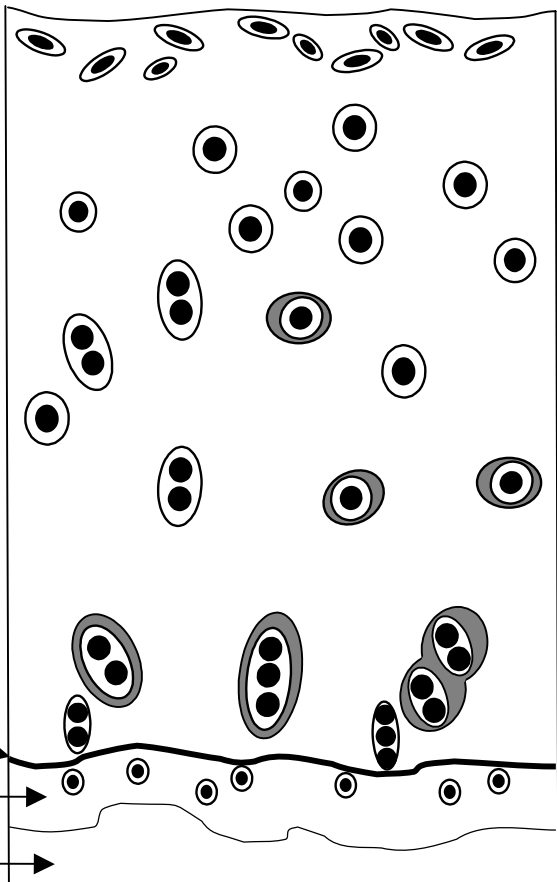

Tidemark

Calcified cartilage

Subchondral bone

Supplement: MOESM1 [file 9510792]
